# Supplementary material
Source: bioRxiv or medRxiv preprint supplement (https://medrxiv.org/content/medrxiv/early/2021/09/27/2021.09.25.21264117/DC6/embed/media-6.pdf)
Supplement: Supplementary file [file media-6.pdf]

**Supplementary Table 5. Monocyte surface receptor expression as Mean Fluorescence Intensity (MFI)**

|                                         |               |      | No Covid<br>Infection | 1-2 months<br>post COVID<br>infection | 6-9 months<br>post COVID<br>infection | Statistical<br>Significance |
|-----------------------------------------|---------------|------|-----------------------|---------------------------------------|---------------------------------------|-----------------------------|
| <b>Total<br/>Monocytes</b>              | <b>CX3CR1</b> | Mean | 14659                 | 11187                                 | 13886                                 | <b>0.012</b>                |
|                                         |               | SD   | 3328                  | 2255                                  | 2411                                  |                             |
|                                         | <b>CCR2</b>   | Mean | 284856                | 246892                                | 314032                                | <b>0.021</b>                |
|                                         |               | SD   | 65721                 | 64926                                 | 36056                                 |                             |
|                                         | <b>CD11b</b>  | Mean | 8288                  | 22217                                 | 13074                                 | <b>0.015</b>                |
|                                         |               | SD   | 4180                  | 14215                                 | 10348                                 |                             |
| <b>Classical<br/>Monocytes</b>          | <b>CX3CR1</b> | Mean | 13459                 | 10313                                 | 13113                                 | <b>0.009</b>                |
|                                         |               | SD   | 3016                  | 2102                                  | 2274                                  |                             |
|                                         | <b>CCR2</b>   | Mean | 344941                | 299049                                | 351287                                | 0.064                       |
|                                         |               | SD   | 45175                 | 62347                                 | 38683                                 |                             |
|                                         | <b>CD11b</b>  | Mean | 8342                  | 22649                                 | 13086                                 | <b>0.015</b>                |
|                                         |               | SD   | 4310                  | 14619                                 | 10530                                 |                             |
| <b>Intermediate<br/>Monocytes</b>       | <b>CX3CR1</b> | Mean | 32020                 | 28127                                 | 31114                                 | 0.433                       |
|                                         |               | SD   | 9414                  | 6501                                  | 6844                                  |                             |
|                                         | <b>CCR2</b>   | Mean | 118366                | 64061                                 | 127299                                | <b>0.007</b>                |
|                                         |               | SD   | 63714                 | 28494                                 | 51585                                 |                             |
|                                         | <b>CD11b</b>  | Mean | 14043                 | 26926                                 | 18178                                 | 0.072                       |
|                                         |               | SD   | 7902                  | 16191                                 | 13349                                 |                             |
| <b>Non-<br/>Classical<br/>Monocytes</b> | <b>CX3CR1</b> | Mean | 45429                 | 42083                                 | 45711                                 | 0.423                       |
|                                         |               | SD   | 7431                  | 7233                                  | 6917                                  |                             |
|                                         | <b>CCR2</b>   | Mean | 20651                 | 9612                                  | 24164                                 | <b>0.007</b>                |
|                                         |               | SD   | 11739                 | 4882                                  | 13602                                 |                             |
|                                         | <b>CD11b</b>  | Mean | 7443                  | 14230                                 | 10319                                 | <b>0.023</b>                |
|                                         |               | SD   | 2487                  | 8066                                  | 4865                                  |                             |
